# Supplementary material for: The effect of mobility restrictions on the SARS-CoV-2 diffusion: lessons from the first wave in Sweden, USA, France and Colombia.
Source: Research Square preprint supplement (doi:10.21203/rs.3.rs-289859/v1), 2021-03-16
Supplement: Supplementary file 1 [file ed23b12559c44409342e9404.docx]

Supplementary Files:

Supplementary figure 1: cumulative percentage of deviance explained by each variable (blue-foi; green – cases the previous week; pink – the interaction between foi and previous week’s cases).


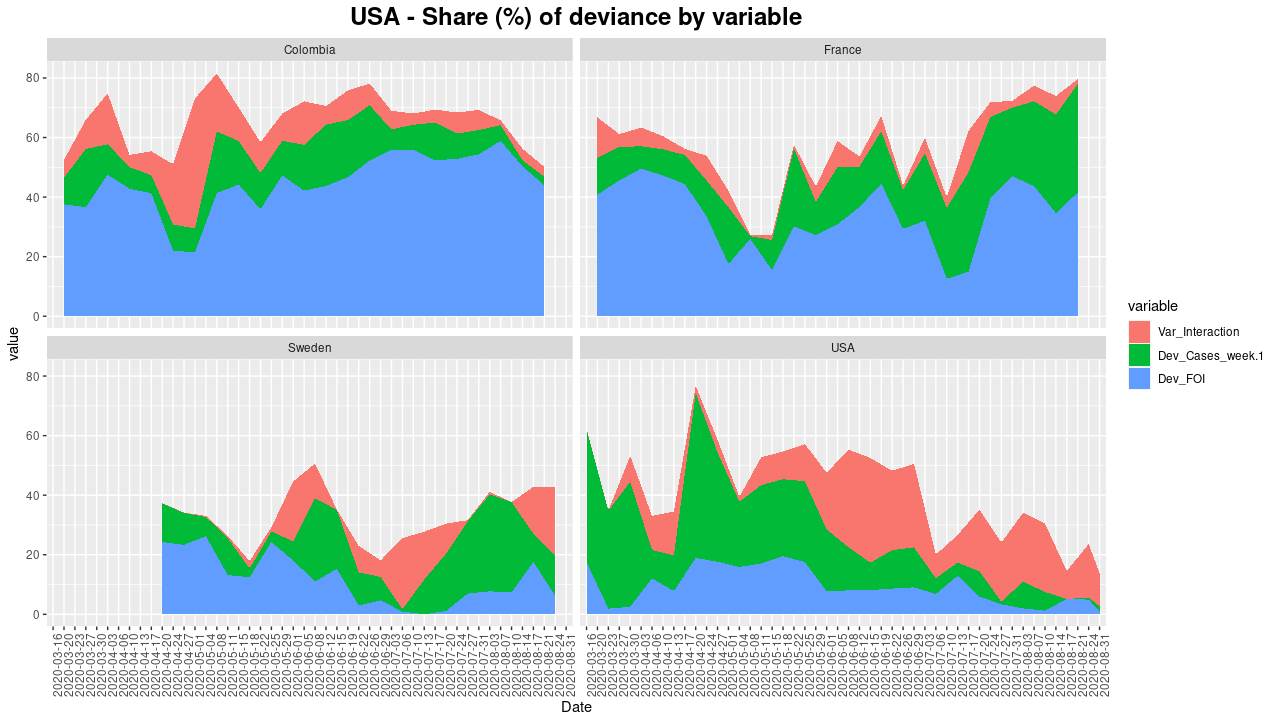


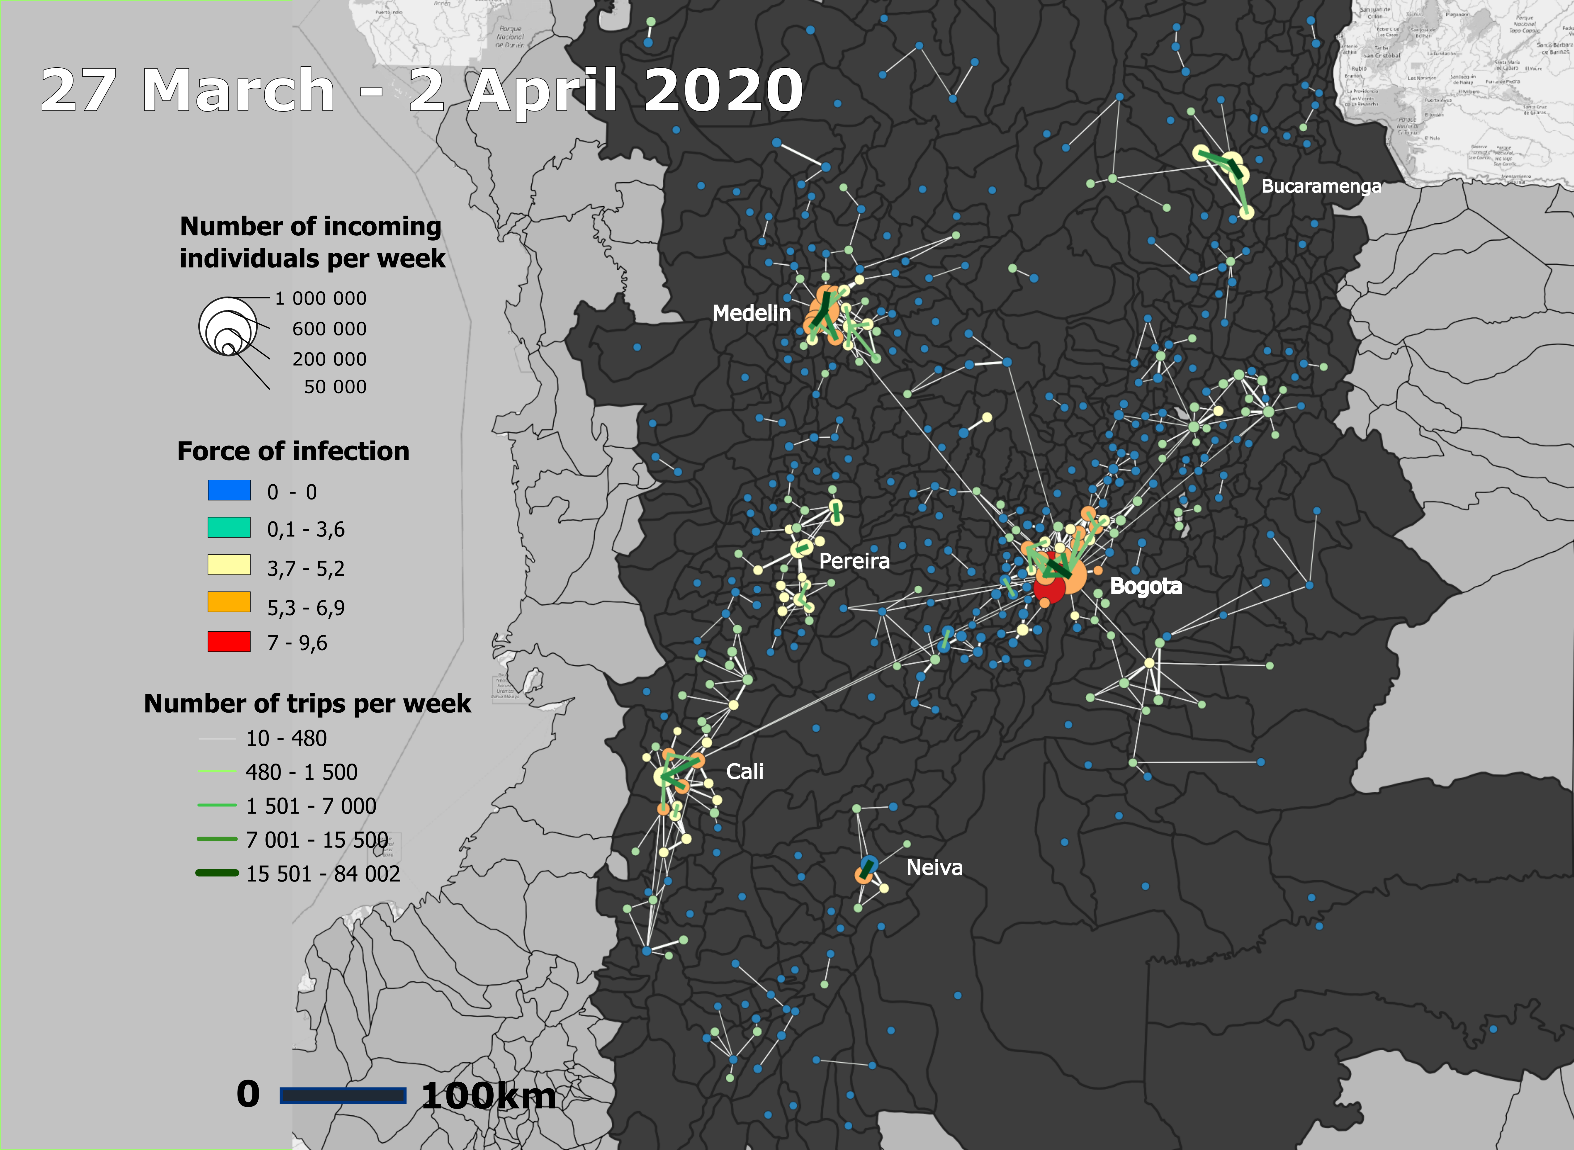

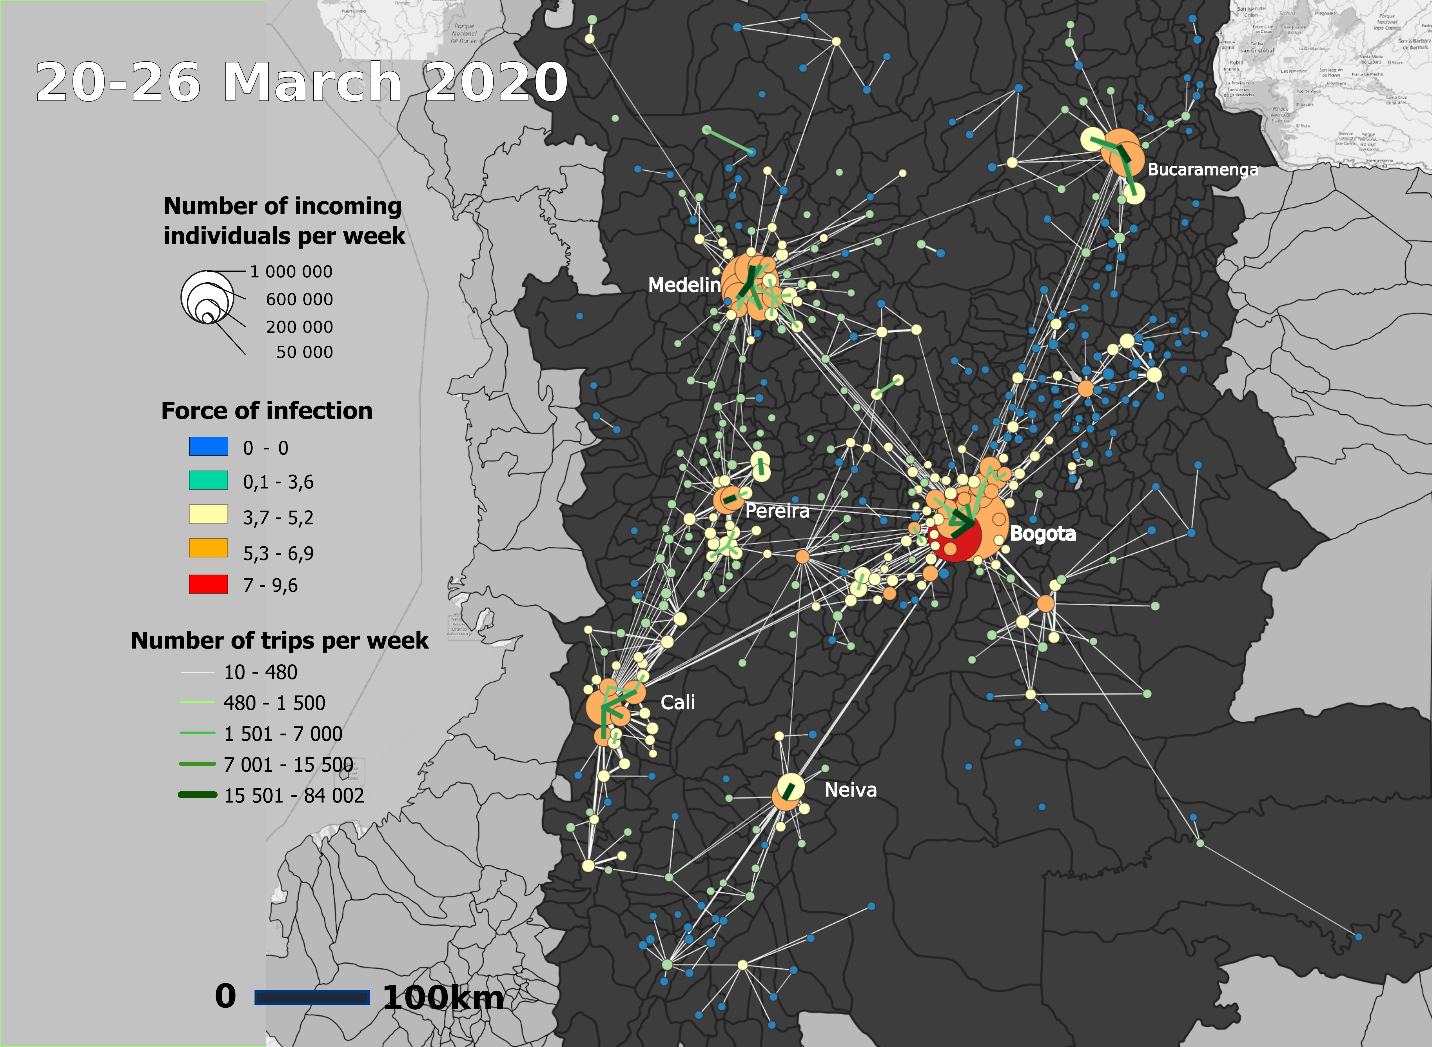


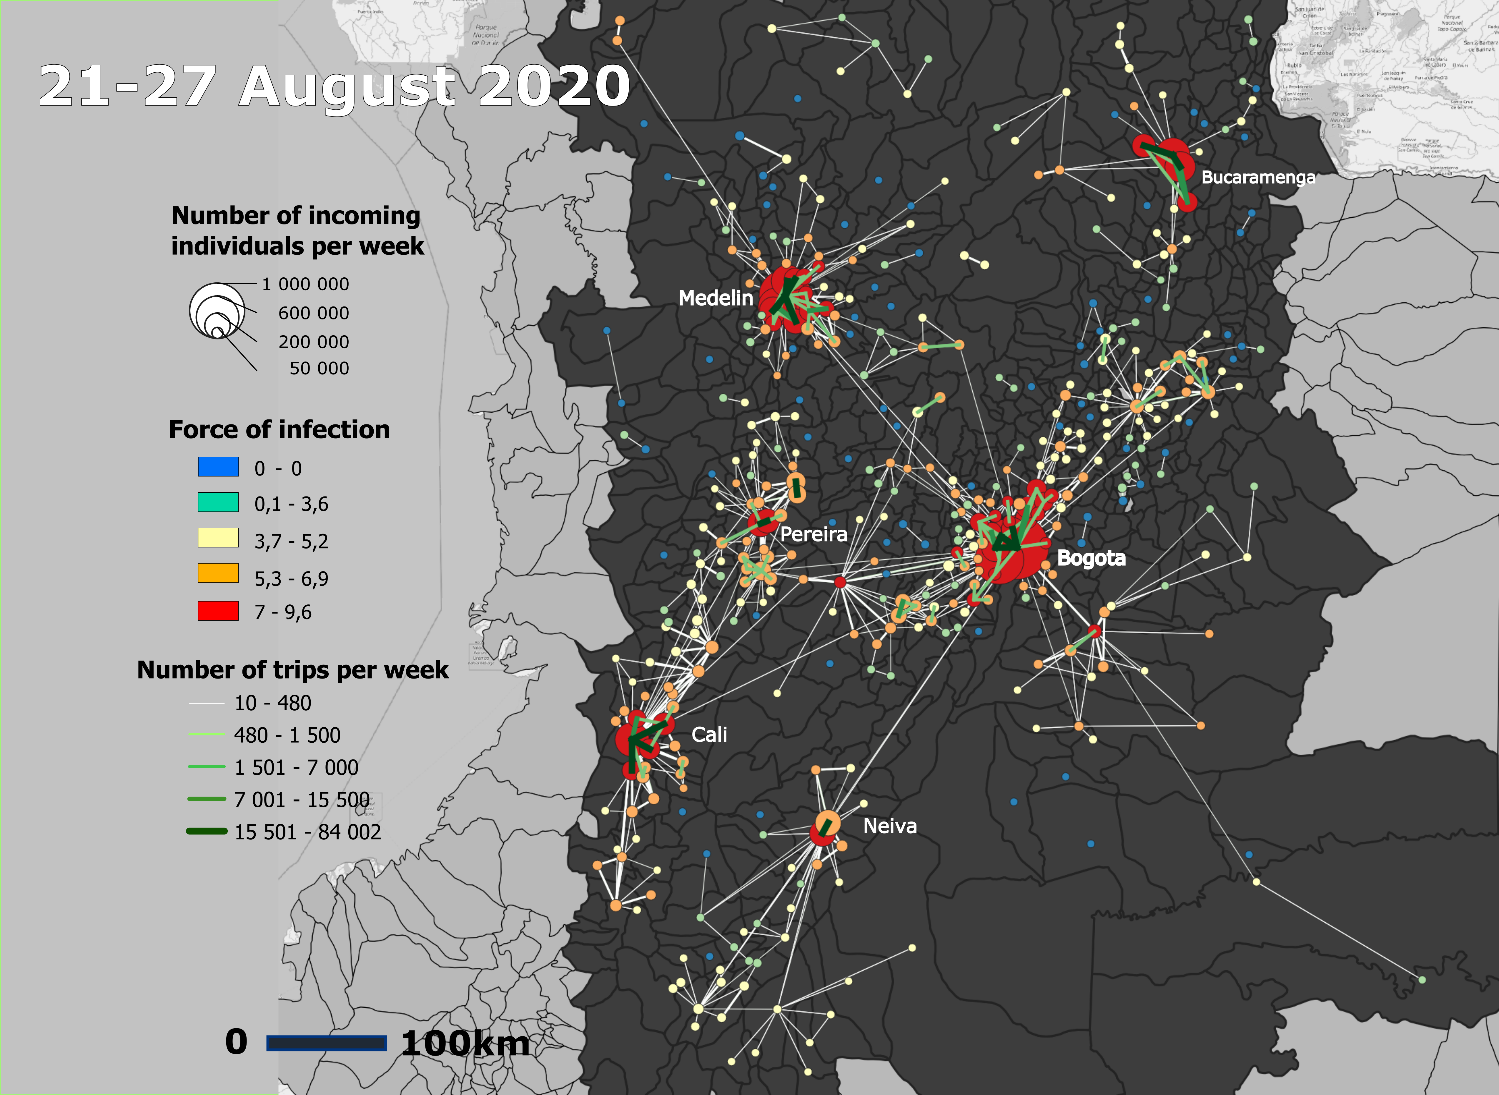
Collection of maps 1 : Mobility flux, number of incoming mobility and FOI Before the lockdown, during the lockdown and in August in Colombia


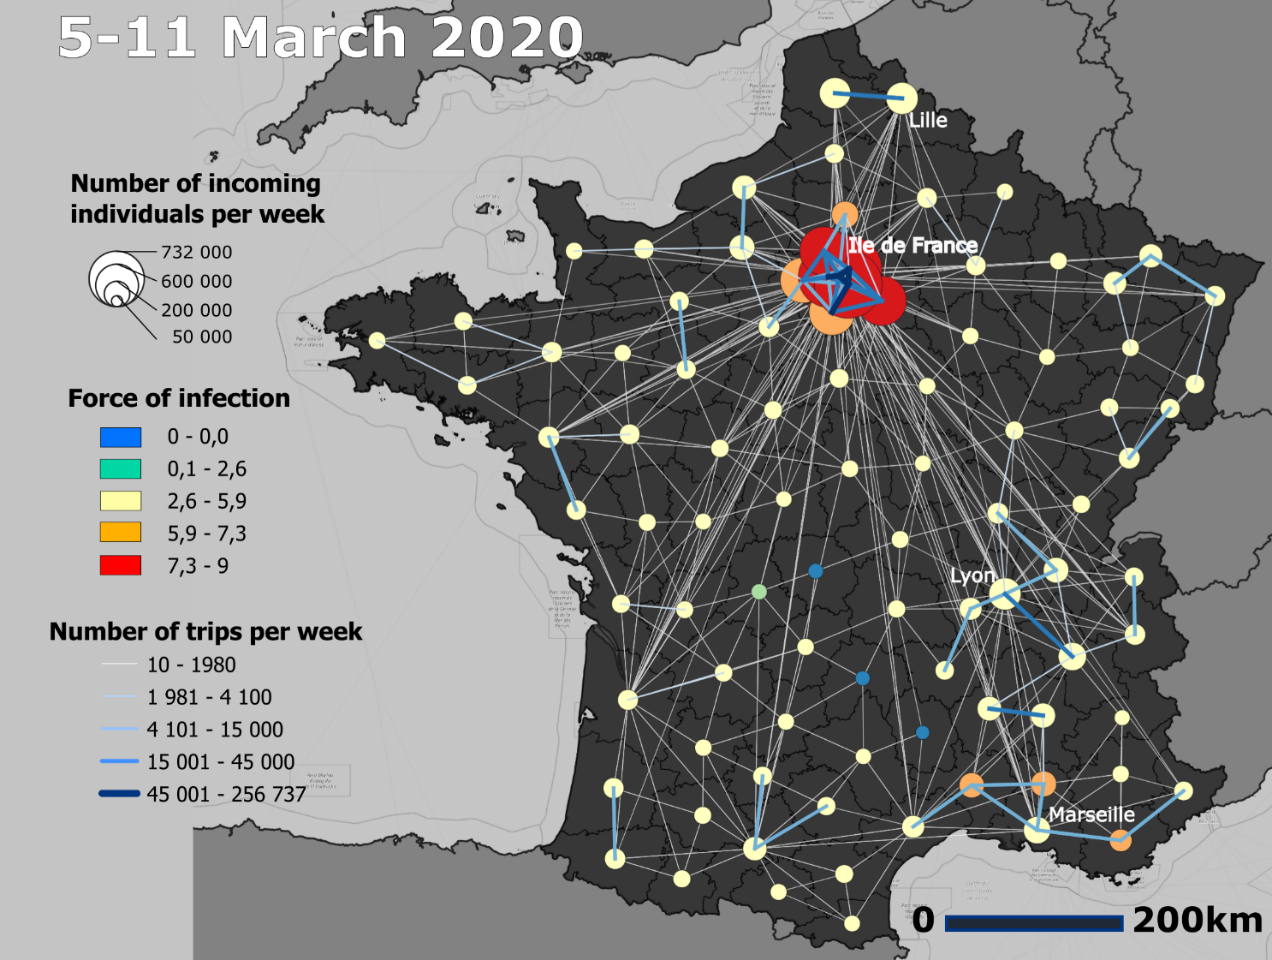


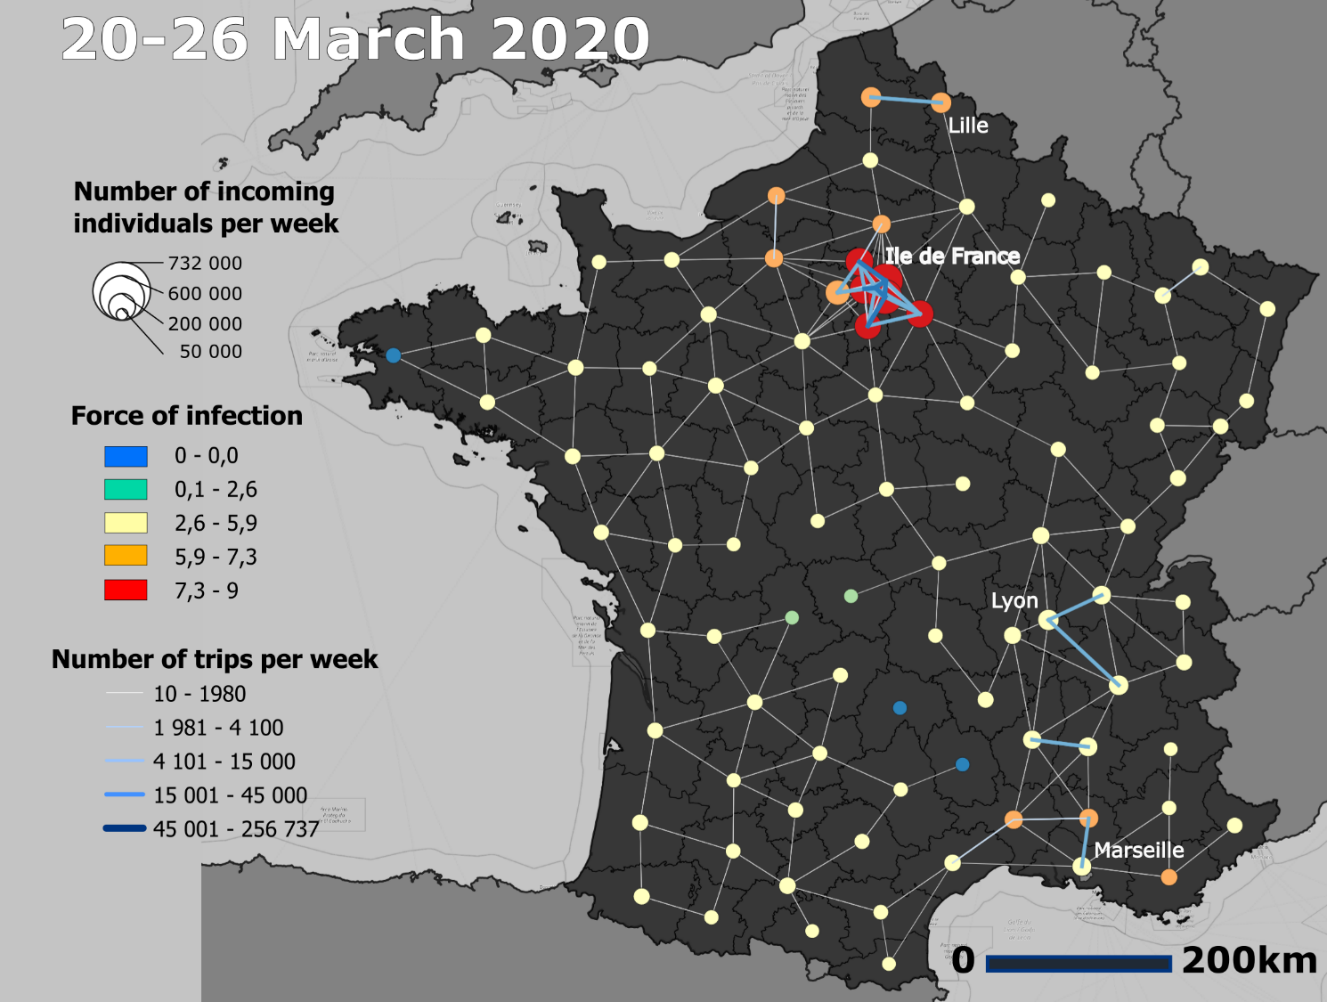

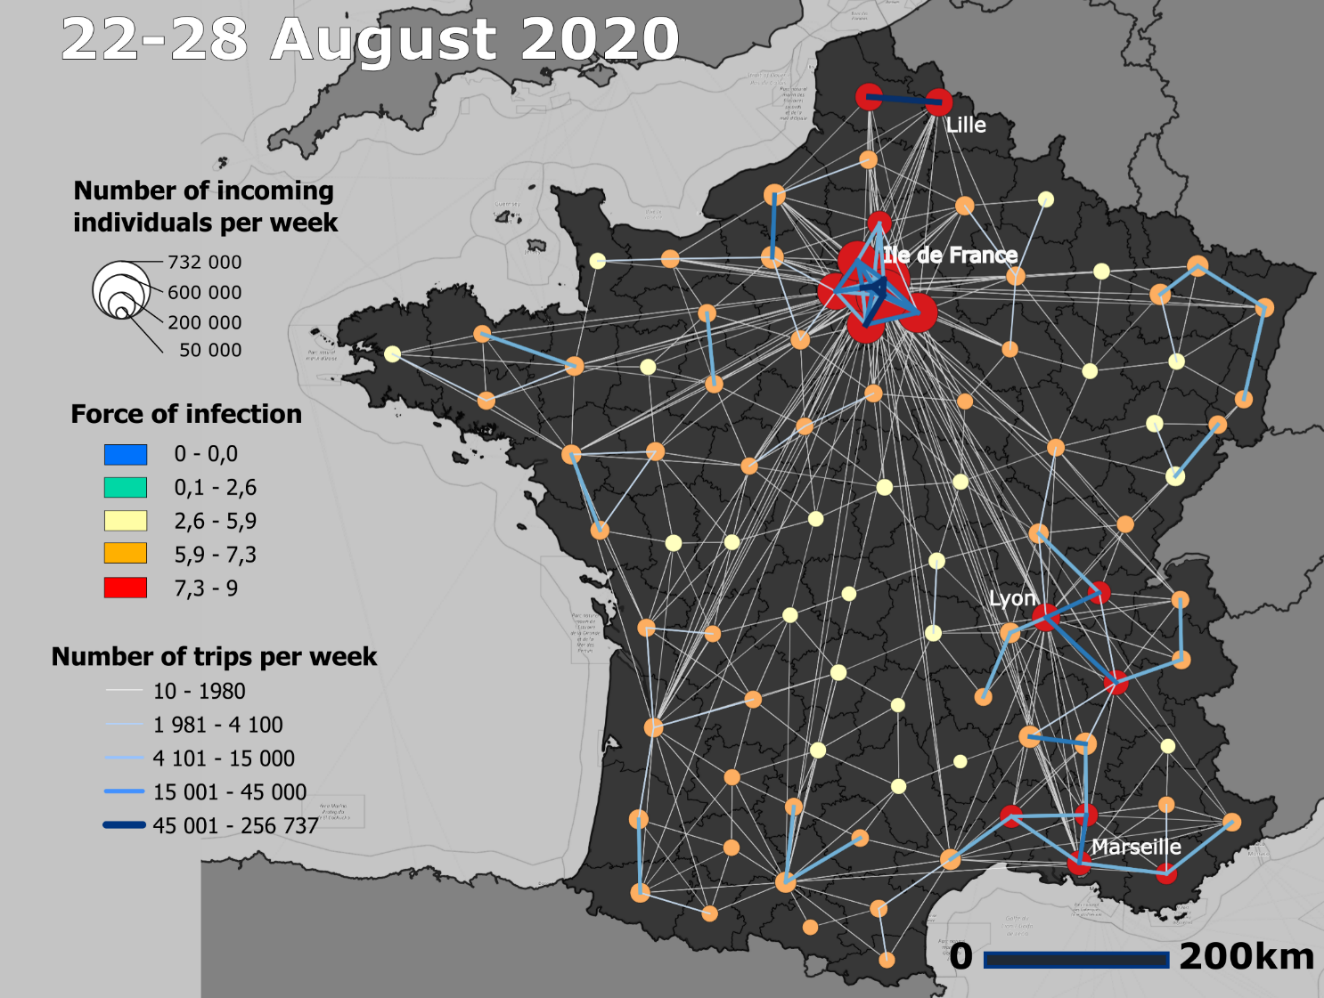
Collection of maps 2 : Mobility flux, number of incoming mobility and FOI Before the lockdown, during the lockdown and in August in France


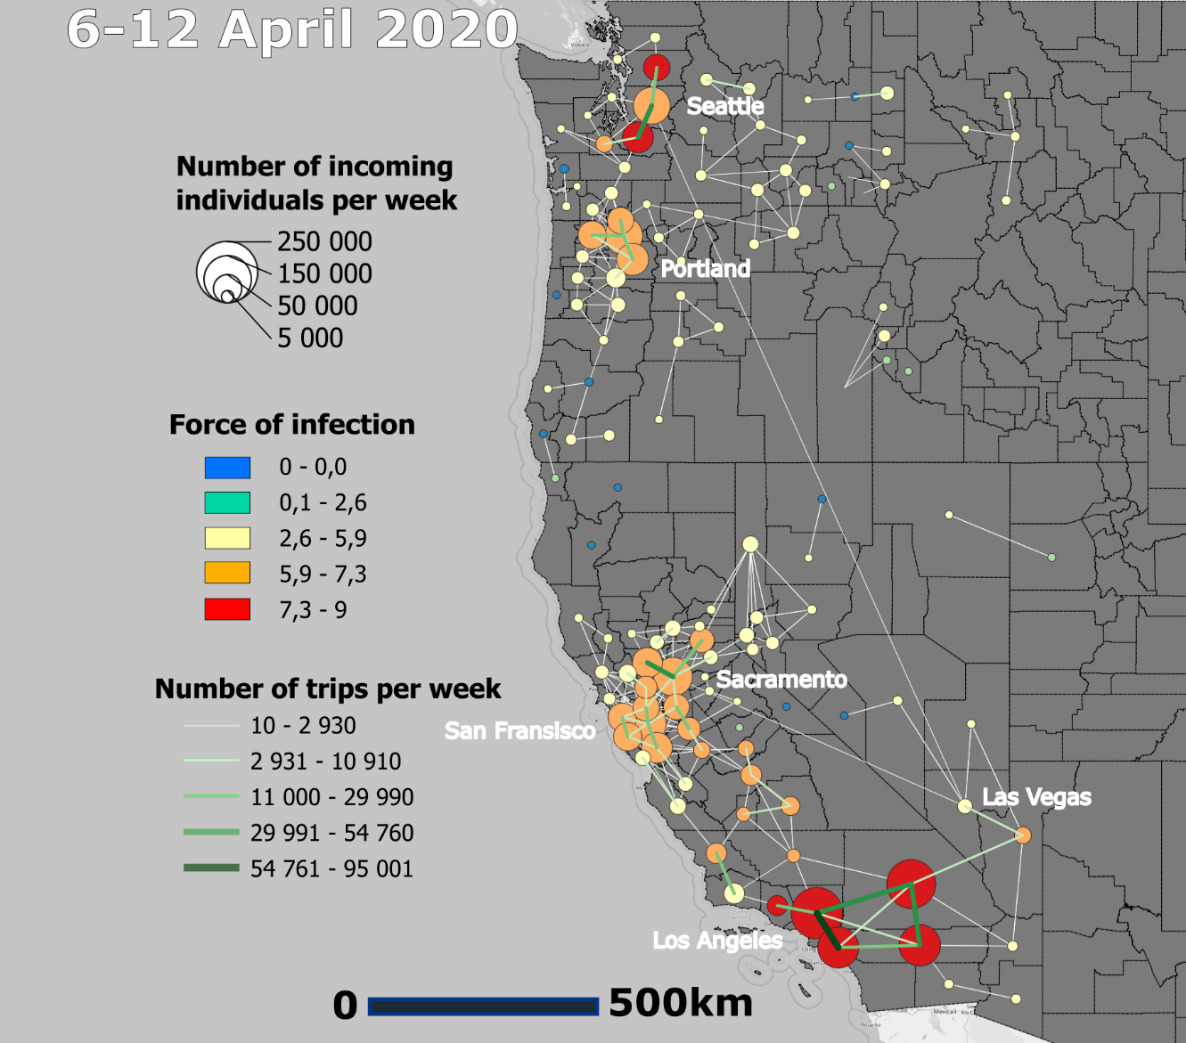

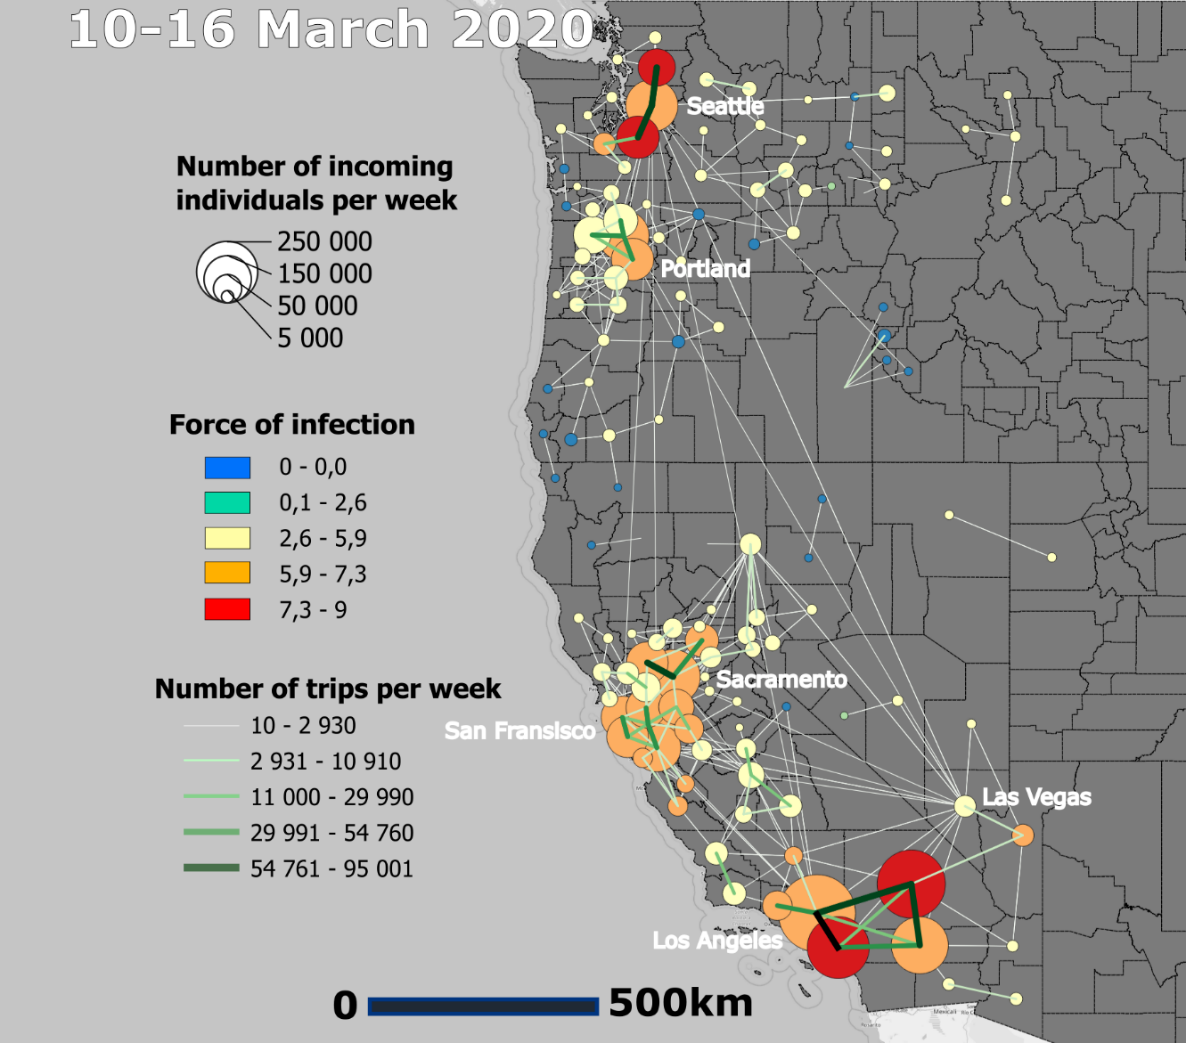


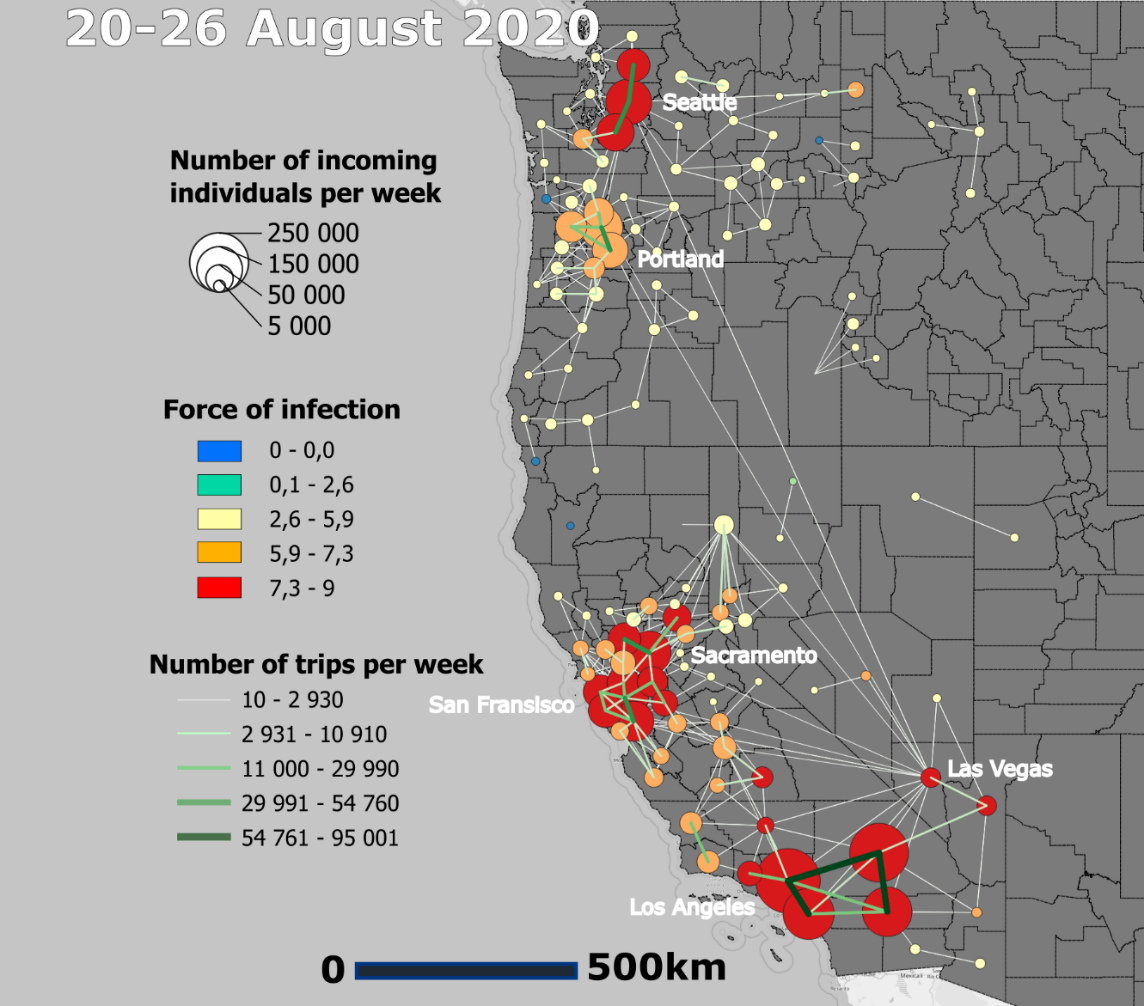

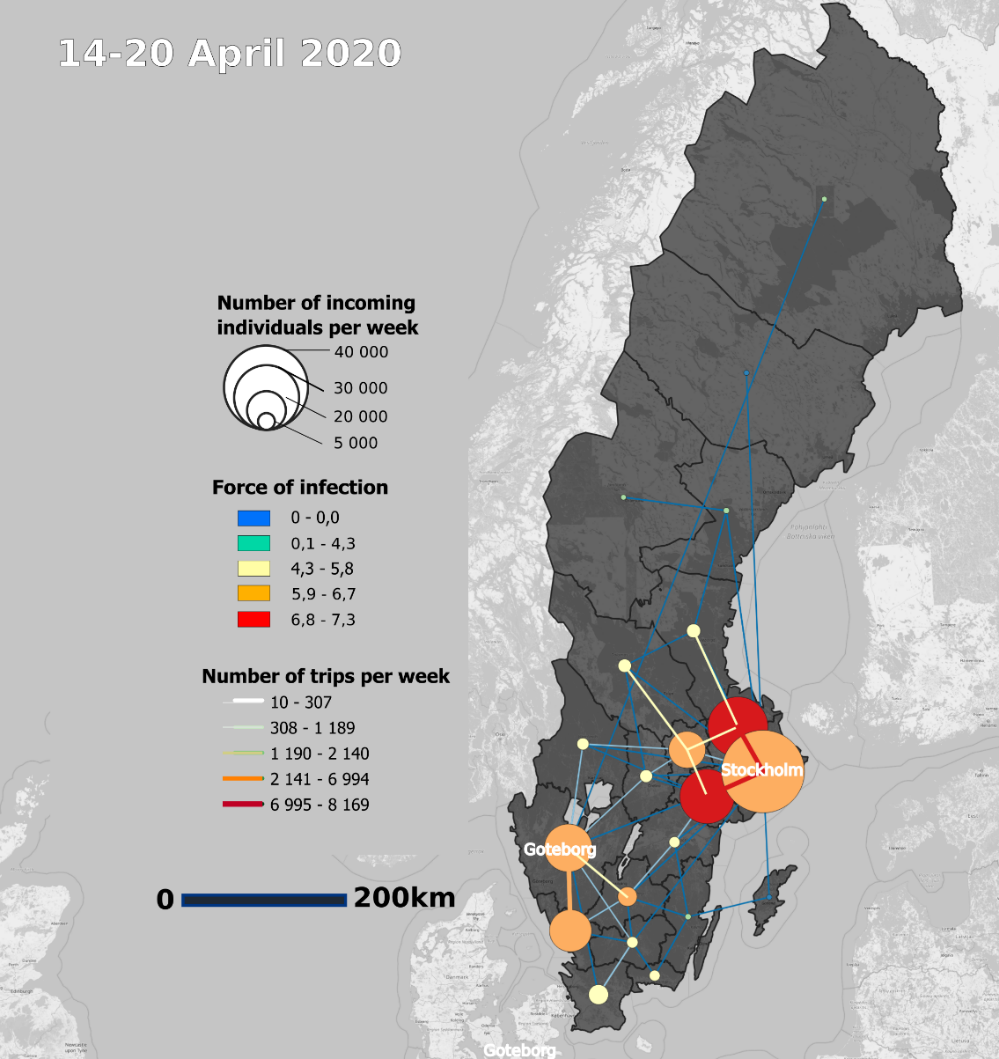


Collection of maps 3 :Mobility flux, number of incoming mobility and FOI Before the lockdown, during the lockdown and in August in the west coast of USA


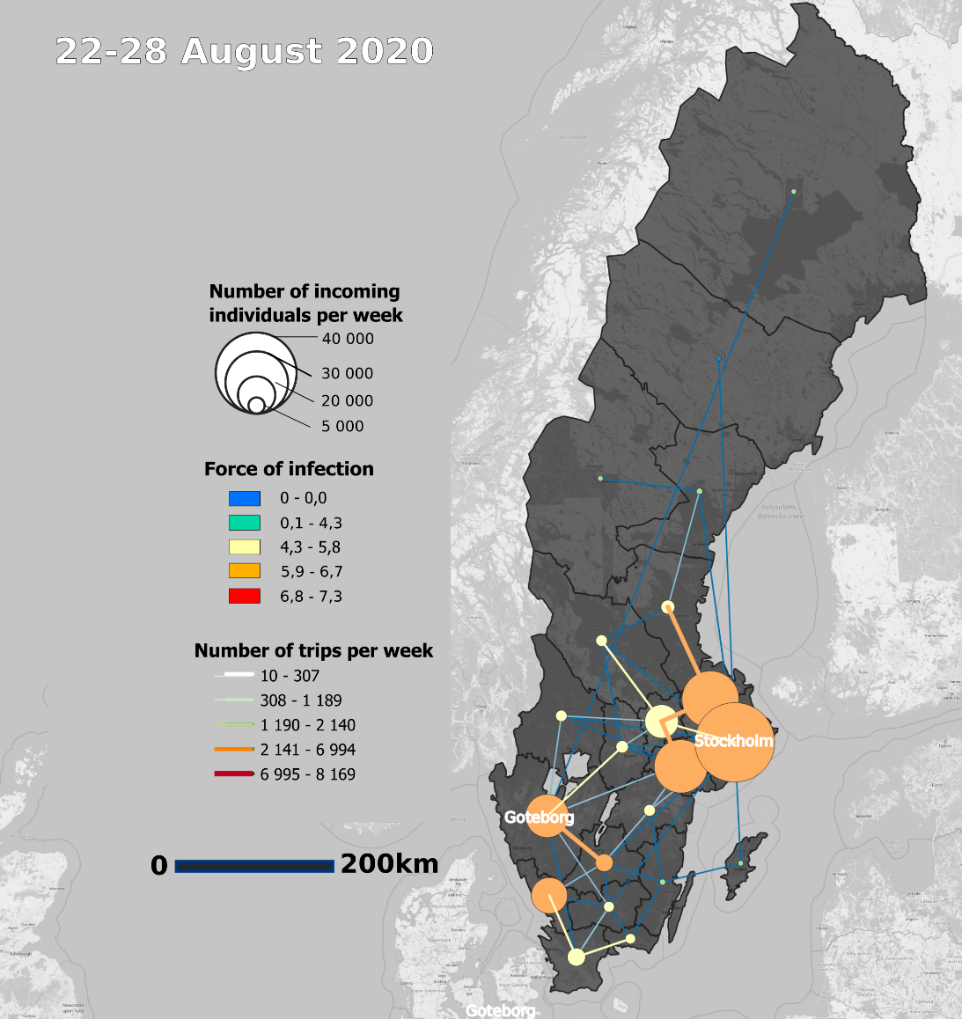

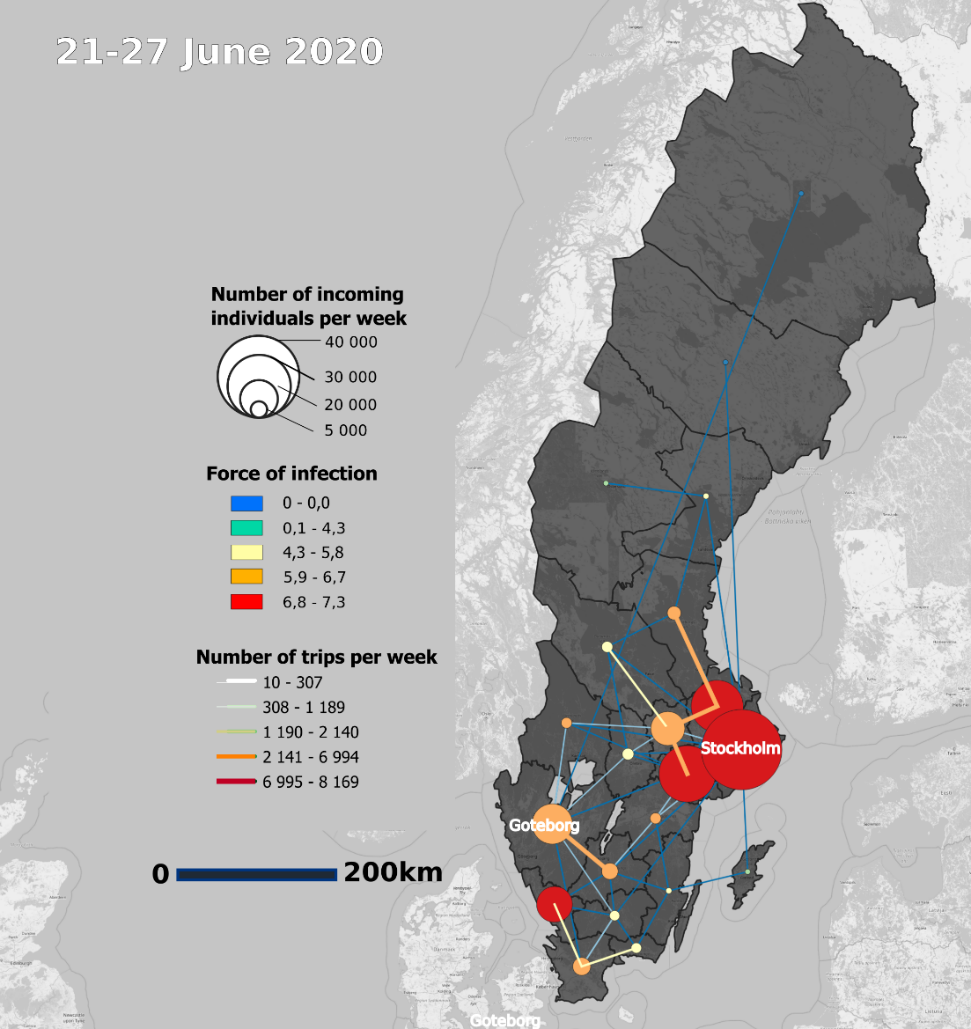


Collection of maps 4: Mobility flux, number of incoming mobility and FOI In April, June and in August in Sweden

Collection of maps 4 :Mobility flux, number of incoming mobility and FOI In April, June and in August in Sweden
